# Supplementary material
Source: PubMed Central journal article supplement (PMC8088828)

# Supplementary Figure 1 (Gel source data)

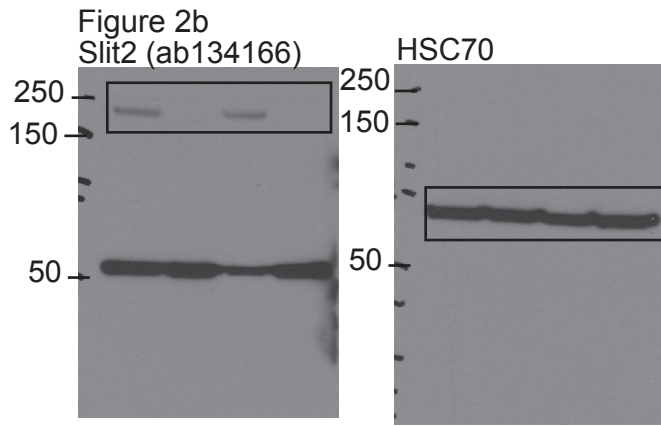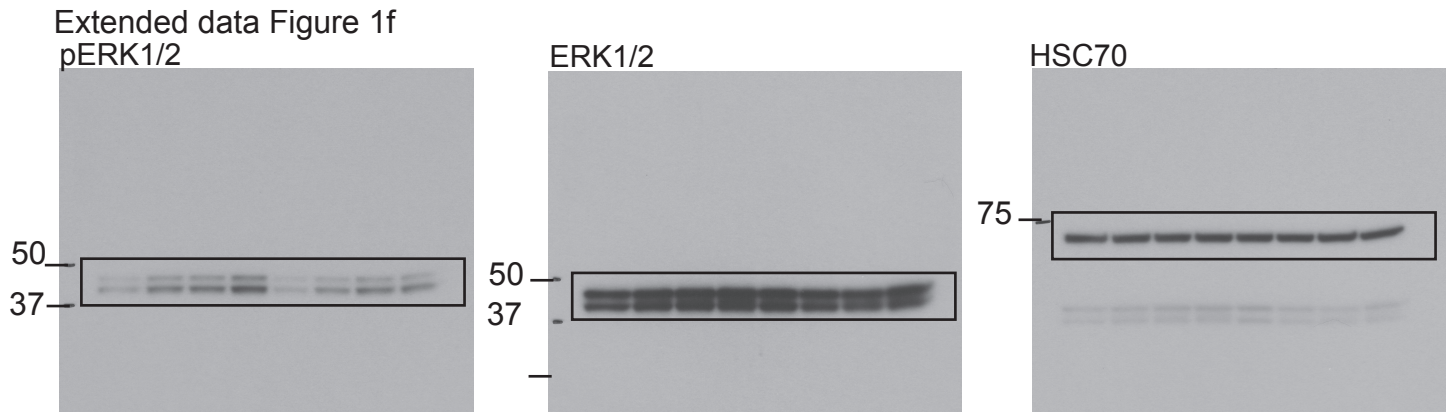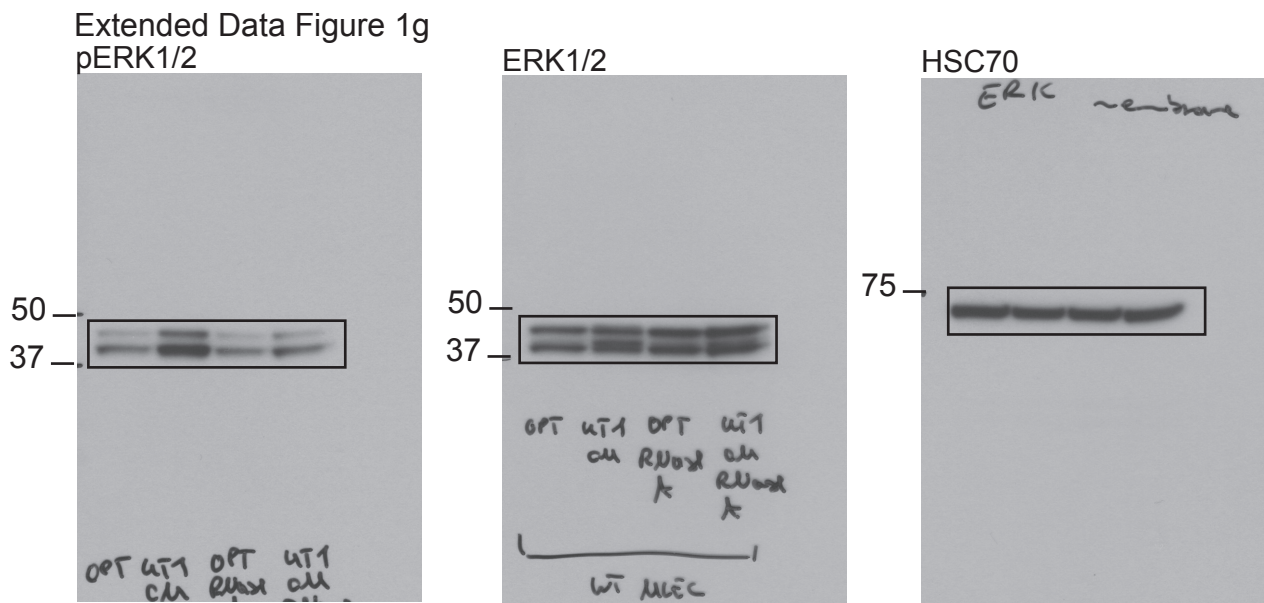

Extended Data Figure 4a  
Flag-Tag

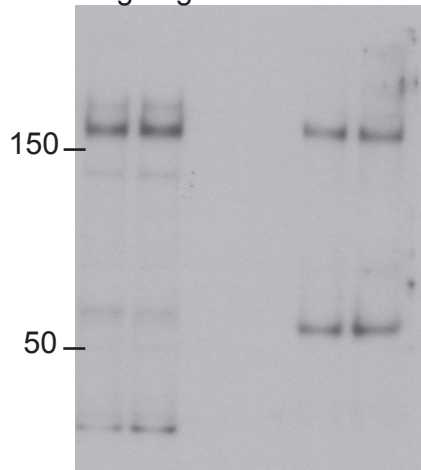

Extended Data Figure 4b

Slit2 (ab134166)

Slit2 (ab134166)

HSC70

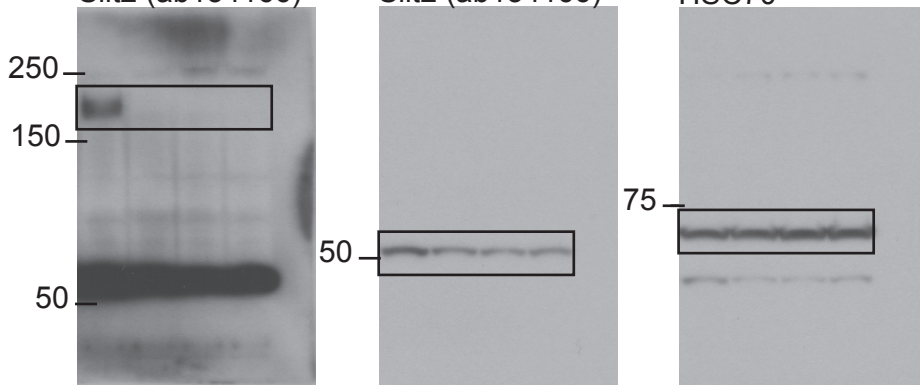

Extended Data Figure 4d  
Slit2 (20217-1-AP)

Slit2 (ab134166)

HSC70

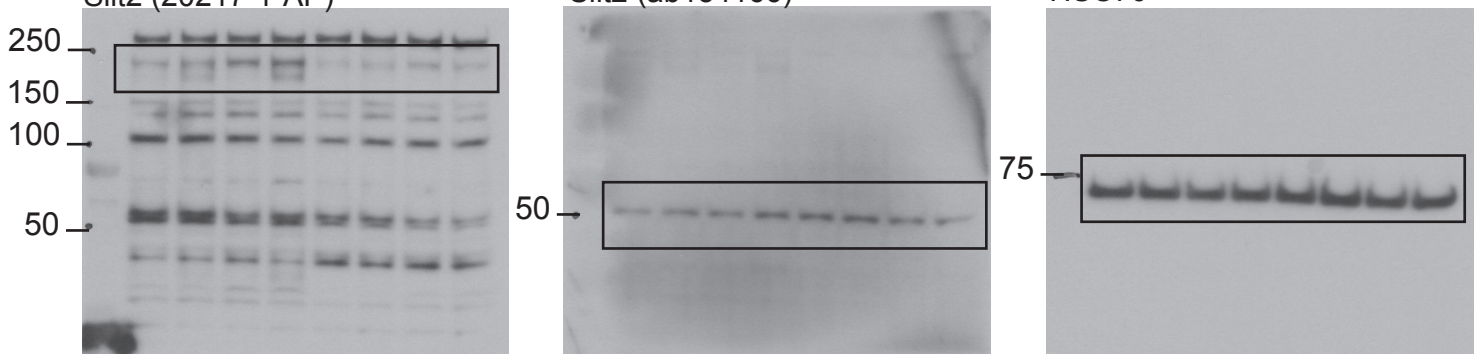

Extended Data Figure 4f  
Slit2 (ab134166)

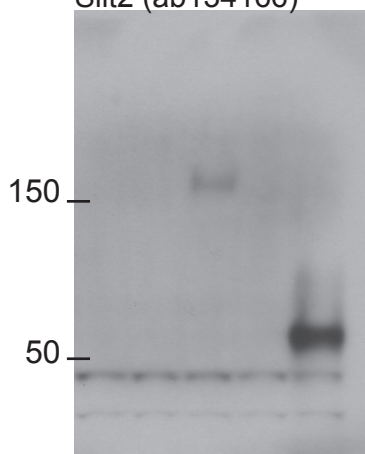

Supplement: NIHMS1691936-supplement-Supplemental_Figure_1.pdf [file NIHMS1691936-supplement-Supplemental_Figure_1.pdf]
