# Supplementary material
Source: PubMed Central journal article supplement (PMC8088828)
Supplement: NIHMS1691936-supplement-Supplementary_information_table_1.pdf [file NIHMS1691936-supplement-Supplementary_information_table_1.pdf]

Supplementary Information Table 1: Genotyping of transgenic mouse lines – Primer sequences.

| Mouse strain          | Expected size                      | Primer name          | Primer sequence            |
|-----------------------|------------------------------------|----------------------|----------------------------|
| Slit2<br>Heterozygous | KO 300 bp<br>WT 500bp              | Slit2 OAP20          | AAGACCTGTGCTTCTGTCAG       |
|                       |                                    | Slit2 OAP21          | AAGTCTAGTAGAGTCGAGCG       |
|                       |                                    | Slit2 OAP22          | AAA CAG GTT TCT ACC GCA CG |
| Slit2fl/fl            | Floxed 320 bp<br>WT 260 bp         | Slit2loxP O230       | TGGTTCACAAACACGAGTCAATTCC  |
|                       |                                    | Slit2loxP O231       | ATGCCTCTTTATGTCCACAGCTCTG  |
| Cdh5(PAC)-<br>CreERT2 | CreERT2 + 548 bp                   | Forward              | TCCTGATGGTGCCTATCCTC       |
|                       |                                    | Reverse              | CCTGTTTTGCACGTTACCG        |
| RPL22HA               | Floxed 290 bp<br>WT 243 bp         | RiboTag loxP Forward | GGGAGGCTTGCTGGATATG        |
|                       |                                    | RiboTag loxP Reverse | TTTCCAGACACAGGCTAAGTACAC   |
| MMTV-PyMT             | MMTV-PyMT 556 bp<br>Control 200 bp | PyMT forward         | GGAAGCAAGTACTTCACAAGGG     |
|                       |                                    | PyMT reverse         | GGAAAGTCACTAGGAGCAGGG      |
|                       |                                    | Control forward      | CAA ATGTTGCTTGTCTGG TG     |
|                       |                                    | Control reverse      | GTCAGTCGAGTGCACAGTTT       |
| MMTV-Cre              | MMTV-Cre 250 bp                    | MMTV-Cre forward     | CTGATCTGAGCTCTGAGTG        |
|                       |                                    | MMTV-Cre Reverse     | CATCACTCGTTGCATCGACC       |
| Tlr3 KO               | KO 208 bp<br>WT 341 bp             | Tlr3 Mutant Forward  | GCCAGAGGCCACTTG TGT AG     |
|                       |                                    | Tlr3 WT Forward      | GCA ACCCTTTCAAAAACCAG      |
|                       |                                    | Tlr3 Common Reverse  | AATTCATCAGTGCCATGAGTTT     |
